# Supplementary material for: A Cross-Sectional Audit of Nutrition and Health Claims on Dairy Yoghurts in Supermarkets of the Illawarra Region of New South Wales, Australia
Source: MDPI journal article supplement (doi:10.3390/nu13061835), 2021-05-27

---

**Supplementary Material:**

**Table S1 – Nutrient Estimation Table (Fibre)**

**Fibre Content (/100g)**

|                          |      |                    |     |
|--------------------------|------|--------------------|-----|
| Strawberry               | 0.8  | Coconut            | 0.1 |
| Mixed Berry              | 0.6  | Boysenberry        | 0.5 |
| Passionfruit             | 0.6  | Evia               | 1   |
| Mango                    | 0.3  | Apple and Cinnamon | 0.6 |
| Raspberry                | 0.5  | Honey              | 0   |
| Peach and Mango          | 1.2  | Almond Coco Loco   | 1.4 |
| Vanilla                  | 0.4  | Cacao              | 0   |
| Banana                   | 0.4  | Coffee             | 0   |
| Strawberry and Raspberry | 0.99 | Lemon              | 0.3 |
| Natural                  | 0.1  | Banana and Caramel | 0.5 |
| Blueberry                | 0.5  | Dark Cherry        | 0.6 |
| Strawberry and Banana    | 0.2  | Black Cherry       | 0.6 |
| Peach                    | 0.3  | Fruit Salad        | 0.3 |

Supplementary Material

Figure S1: Flow chart of claims included and excluded within the revised FSC(derived from FSANZ Standard 1.2.7)

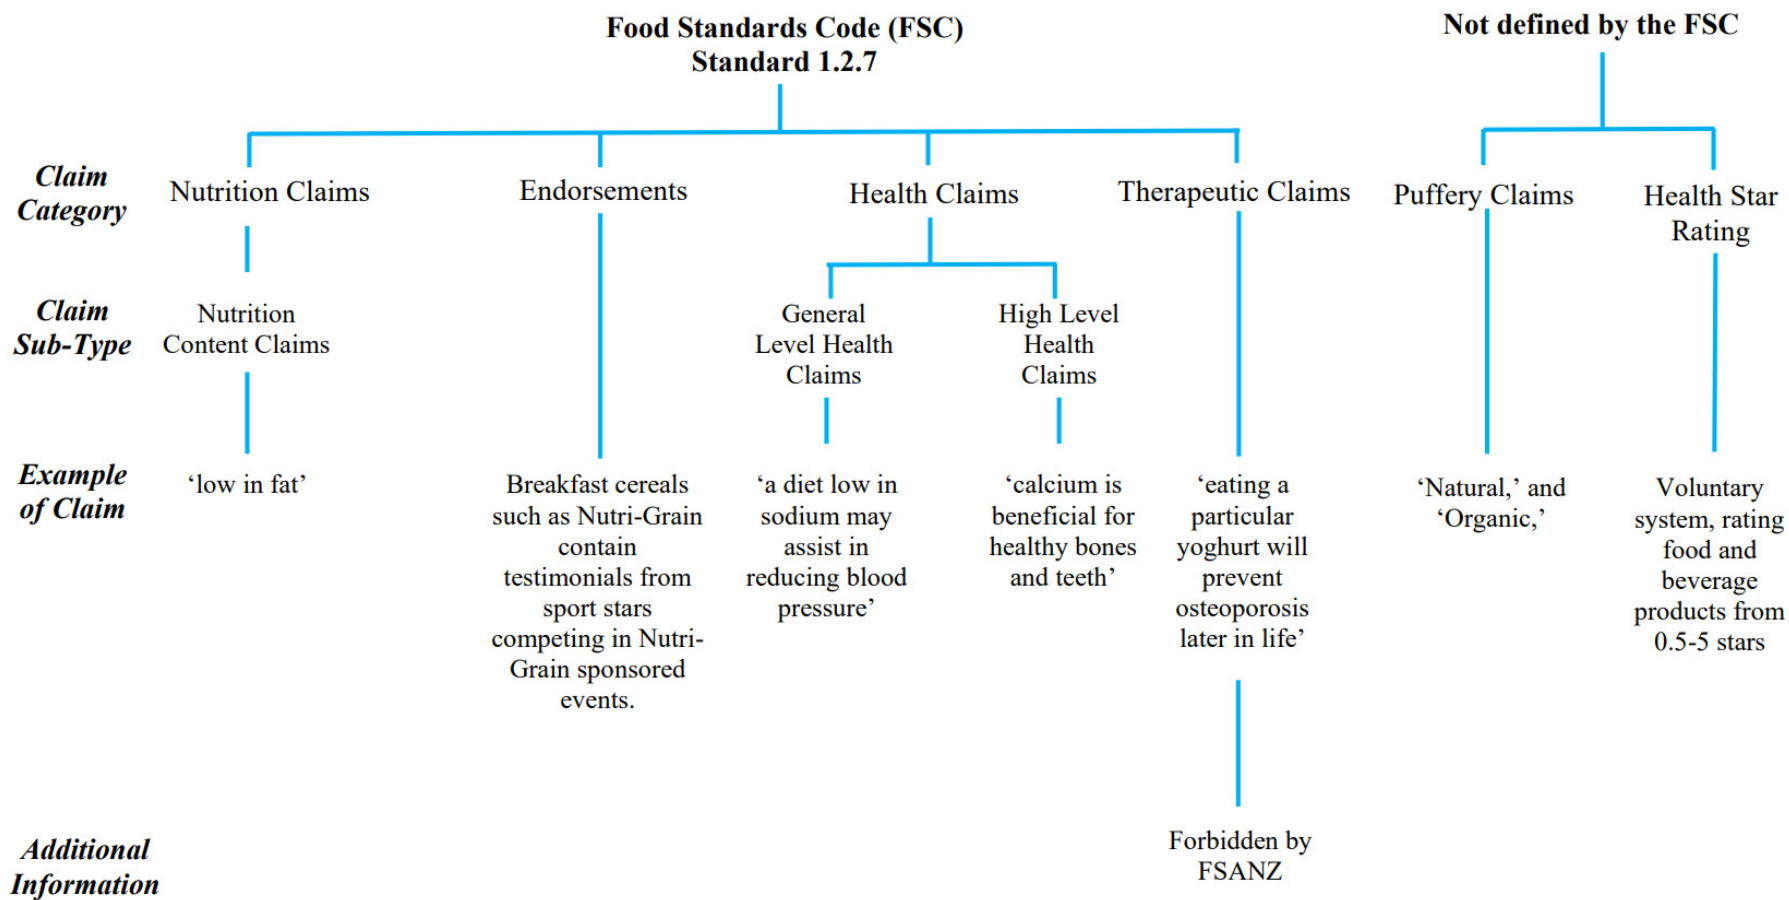

Supplement: s1 [file s1]
